# Supplementary material for: A NanoCurvS platform for quantitative and multiplex analysis of curvature-sensing proteins
Source: Royal Society of Chemistry journal article supplement (doi:10.1039/d2bm01856j), 2023-01-01
Supplement: d2bm01856j1.pdf [file d2bm01856j1.pdf]

SUPPLEMENTARY INFORMATION for  
**A NanoCurvS platform for quantitative and multiplex analysis of curvature-sensing proteins**

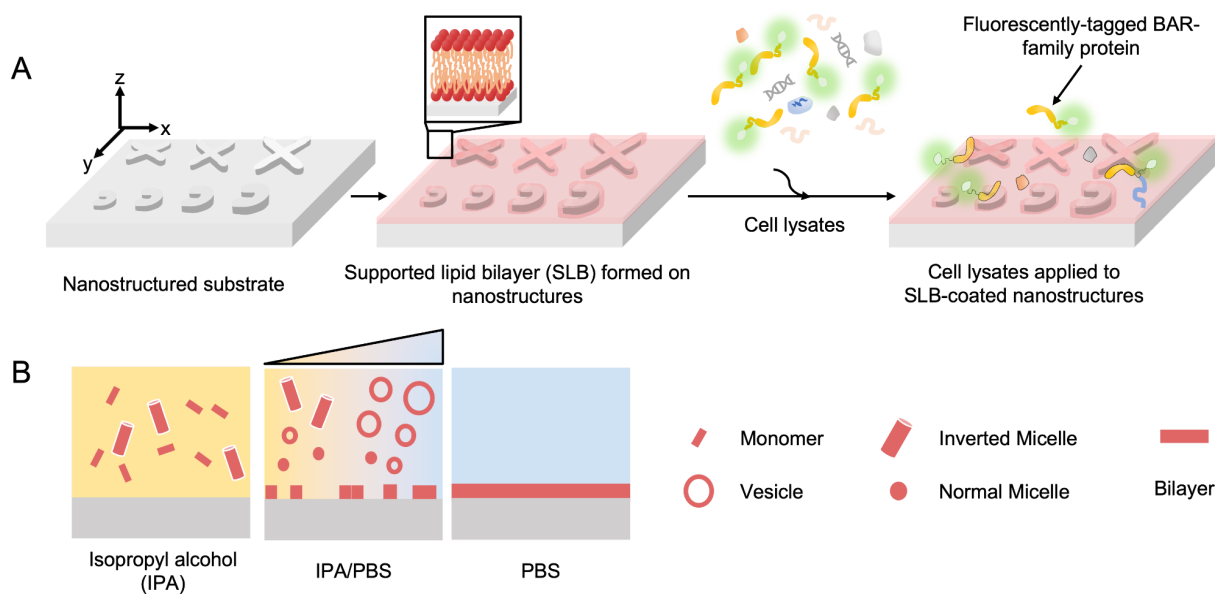

**Supplementary Figure 1. Schematic illustrations of SLBs on nanostructures.**

**(A)** Schematic illustrations of the NanoCurvS assay. **(B)** Illustrations of solvent-assisted lipid bilayer (SALB) formation method.

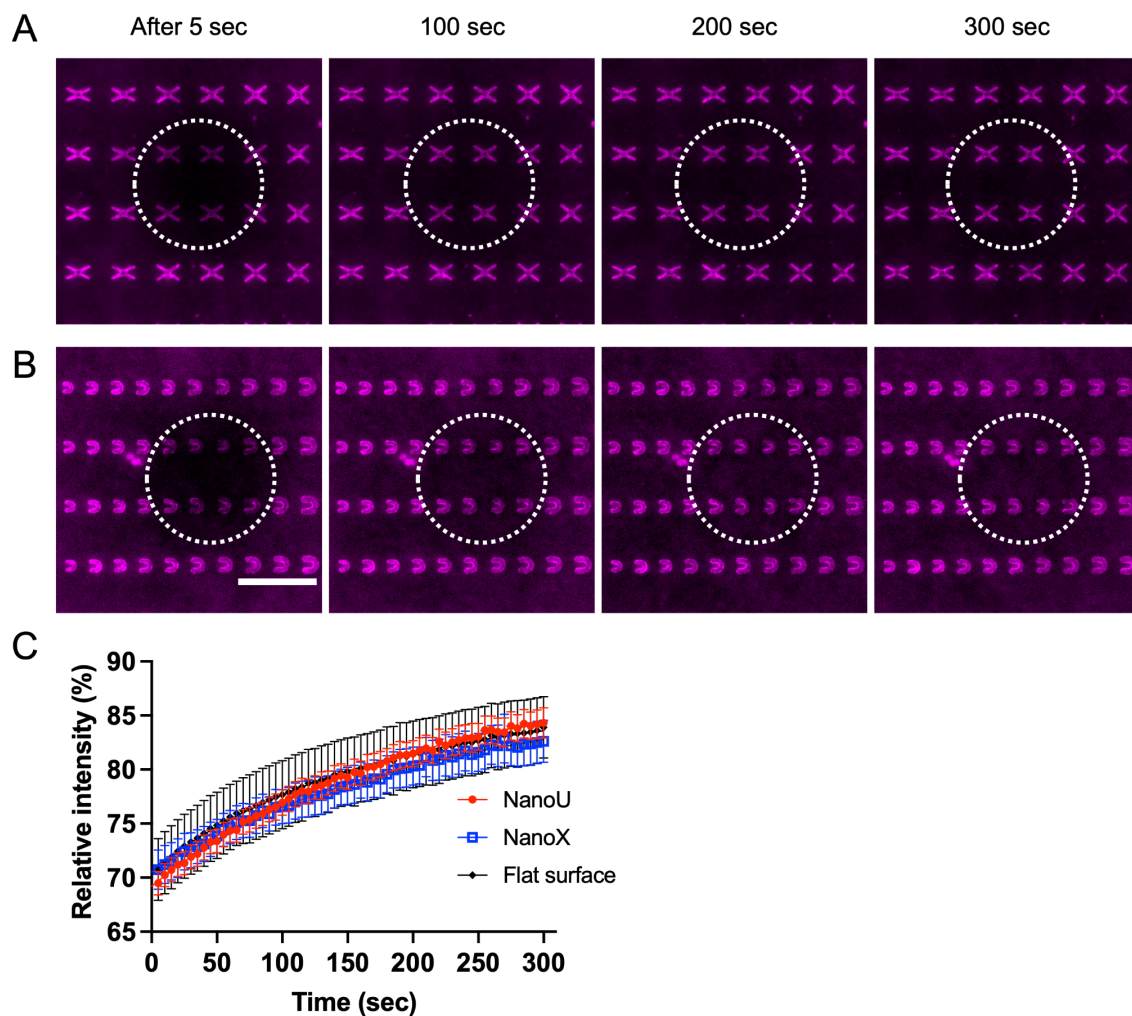

**Supplementary Figure 2. SLBs on nanostructures show similar fluidities as surrounding flat areas.** (A) Representative fluorescence images of lipid bilayers on a nanoX array at different time points after photobleaching. (B) Representative fluorescence images of lipid bilayers on a gradient nanoU array at different time points after photobleaching. For both (A) and (B), the bilayer consists of 70% DOPC, 15% DOPS, 15% PI(4,5)P<sub>2</sub> and ~1% Texas Red-DHPE. White-dashed circles indicate the bleached region. (C) A plot of the time-lapsed fluorescence recovery signals. Scale bar: 20  $\mu$ m.

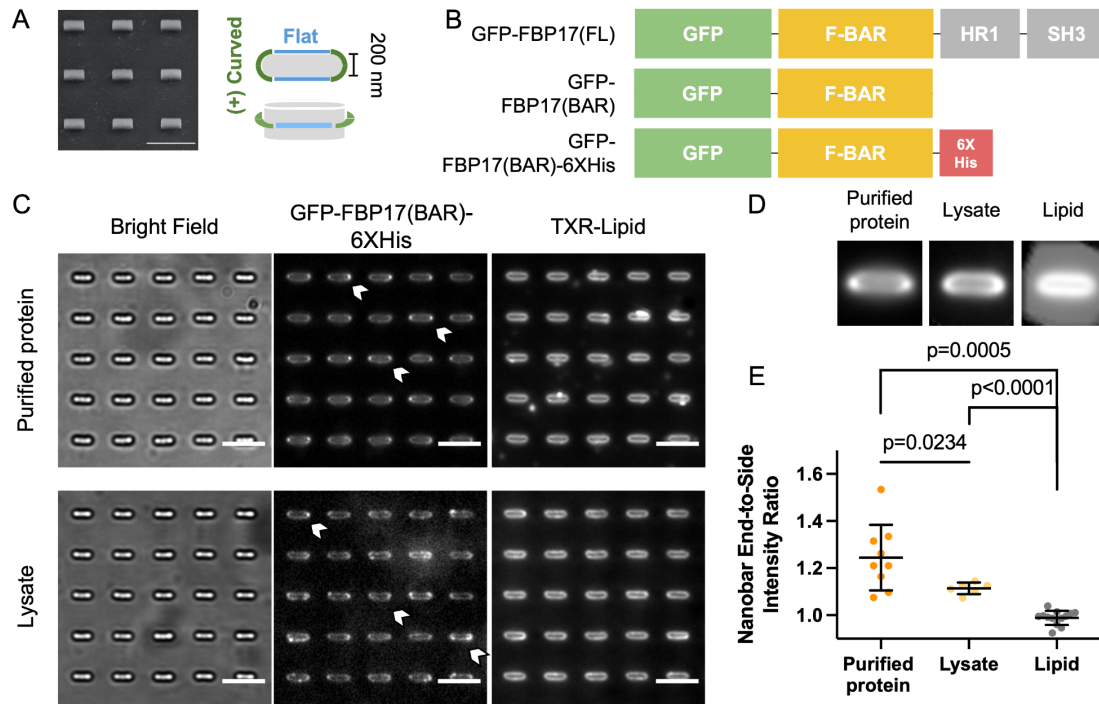

**Supplementary Figure 3. Purified protein and lysates of FBP17 BAR show similar curvature sensitivity on nanobar arrays.**

**(A)** Illustration and a SEM image of a 200-nm nanobar array. All nanobars are 200 nm in width, 1 μm in height and 5 μm in spacing. Scale bar: 5 μm. **(B)** Constructs of the GFP-FBP17 and GFP-FBP17(BAR)-6XHis variants used in this study. **(C)** Representative fluorescence images of GFP-FBP17(BAR)-6XHis purified protein and lysates on SLB-coated nanobar arrays. The lipid bilayer is made of 90% DOPC, 10% DGS-Ni-NTA and doped with ~1% Texas Red-DHPE for bilayer visualization. Scale bar: 5 μm. **(D)** Averaged images of GFP-FBP17(BAR)-6XHis purified protein and lysates on SLB-coated nanobar arrays. **(E)** Quantification of fluorescence intensity of GFP-FBP17(BAR)-6XHis purified protein and lysates on SLB-coated nanobar arrays. Error bars represent standard deviation. Welch's t tests (unpaired, two-tailed, not assuming equal variance) are applied for all statistical analyses.

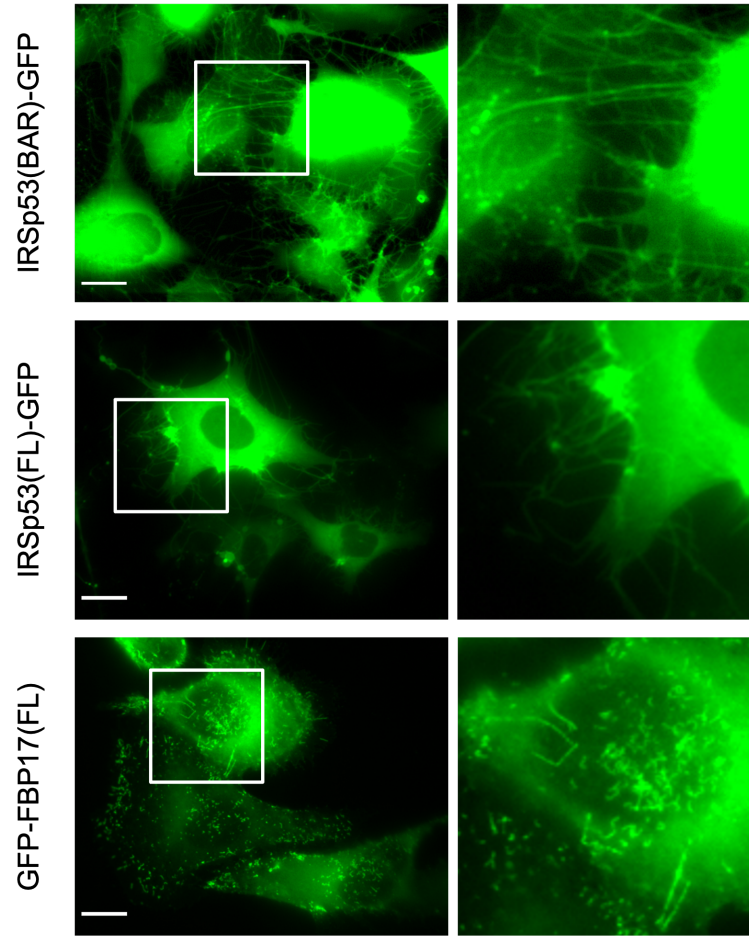

Supplementary Figure 4. Representative fluorescence images of U2OS cells expressing IRSp53(BAR)-GFP, IRSp53(FL)-GFP, and GFP-FBP17(FL). Scale bar: 20  $\mu$ m.



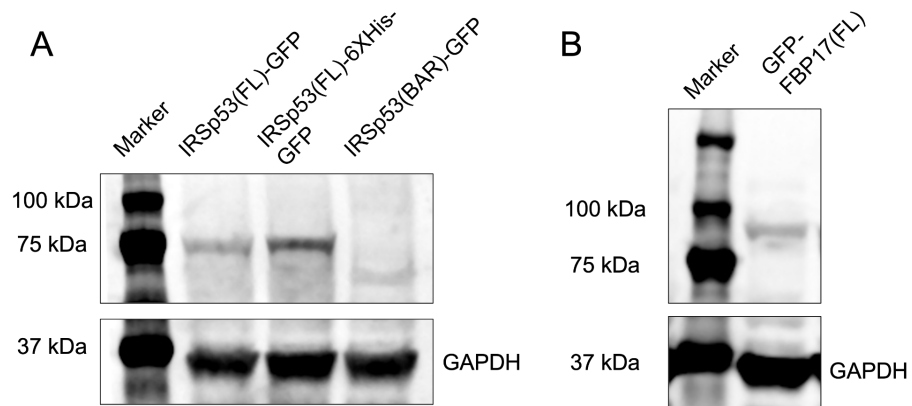

**Supplementary Figure 5. Western blots of protein lysates confirming the presence of transfected proteins.**

**(A)** IRSp53-GFP variants. **(B)** Full-length GFP-FBP17. Both GFP-FBP17 and IRSp53-GFP variants were probed by rabbit anti-GFP antibodies. GAPDH was stained with mouse anti-GAPDH antibodies as a control.

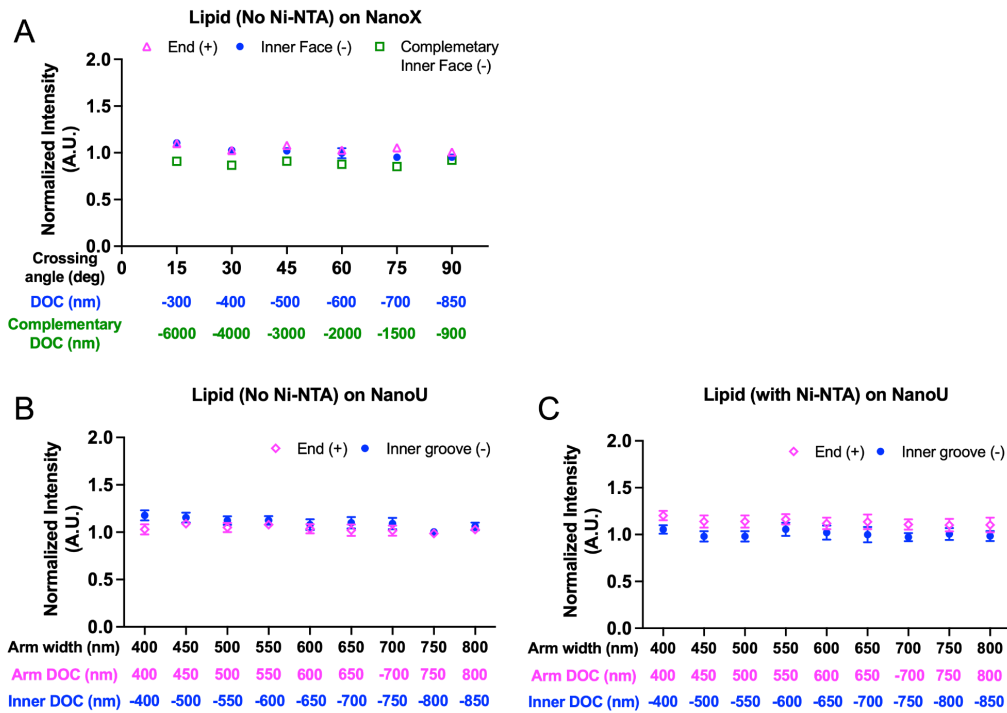

**Supplementary Figure 6. Quantification of TXR-lipid bilayer signals on gradient nanoU and nanoX arrays.**

(A-B) 70% DOPC, 15% DOPS, 15% PIP<sub>2</sub> and ~1% Texas Red-DHPE on (A) gradient nanoX arrays or (B) gradient nanoU arrays. (C) 55% DOPC, 15% DOPS, 15% PIP<sub>2</sub>, 15% DGS-Ni-NTA, and ~1% Texas Red-DHPE on gradient nanoU arrays. Error bars represent standard error of mean.

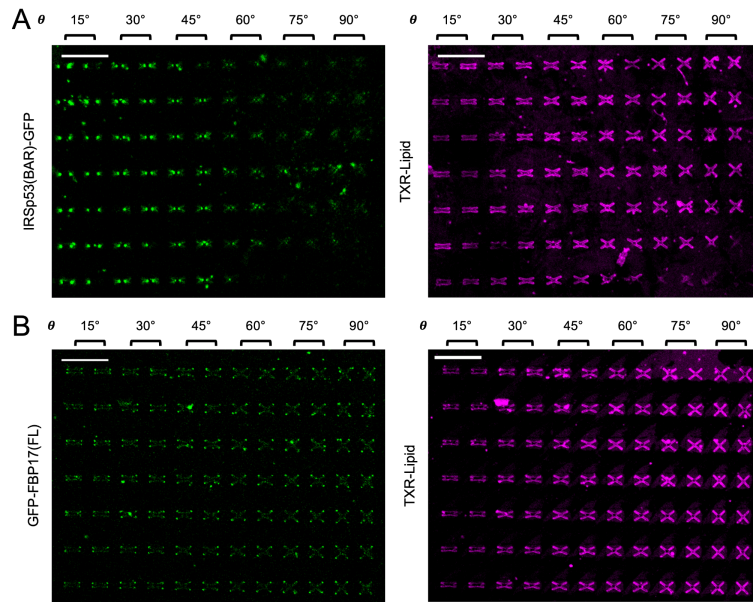

**Supplementary Figure 7. Representative whole-field fluorescence images of BAR protein lysates on SLB-coated nanoX arrays. (A) IRSp53(BAR)-GFP; (B) GFP-FBP17(FL). Scale bar: 20  $\mu\text{m}$ .**

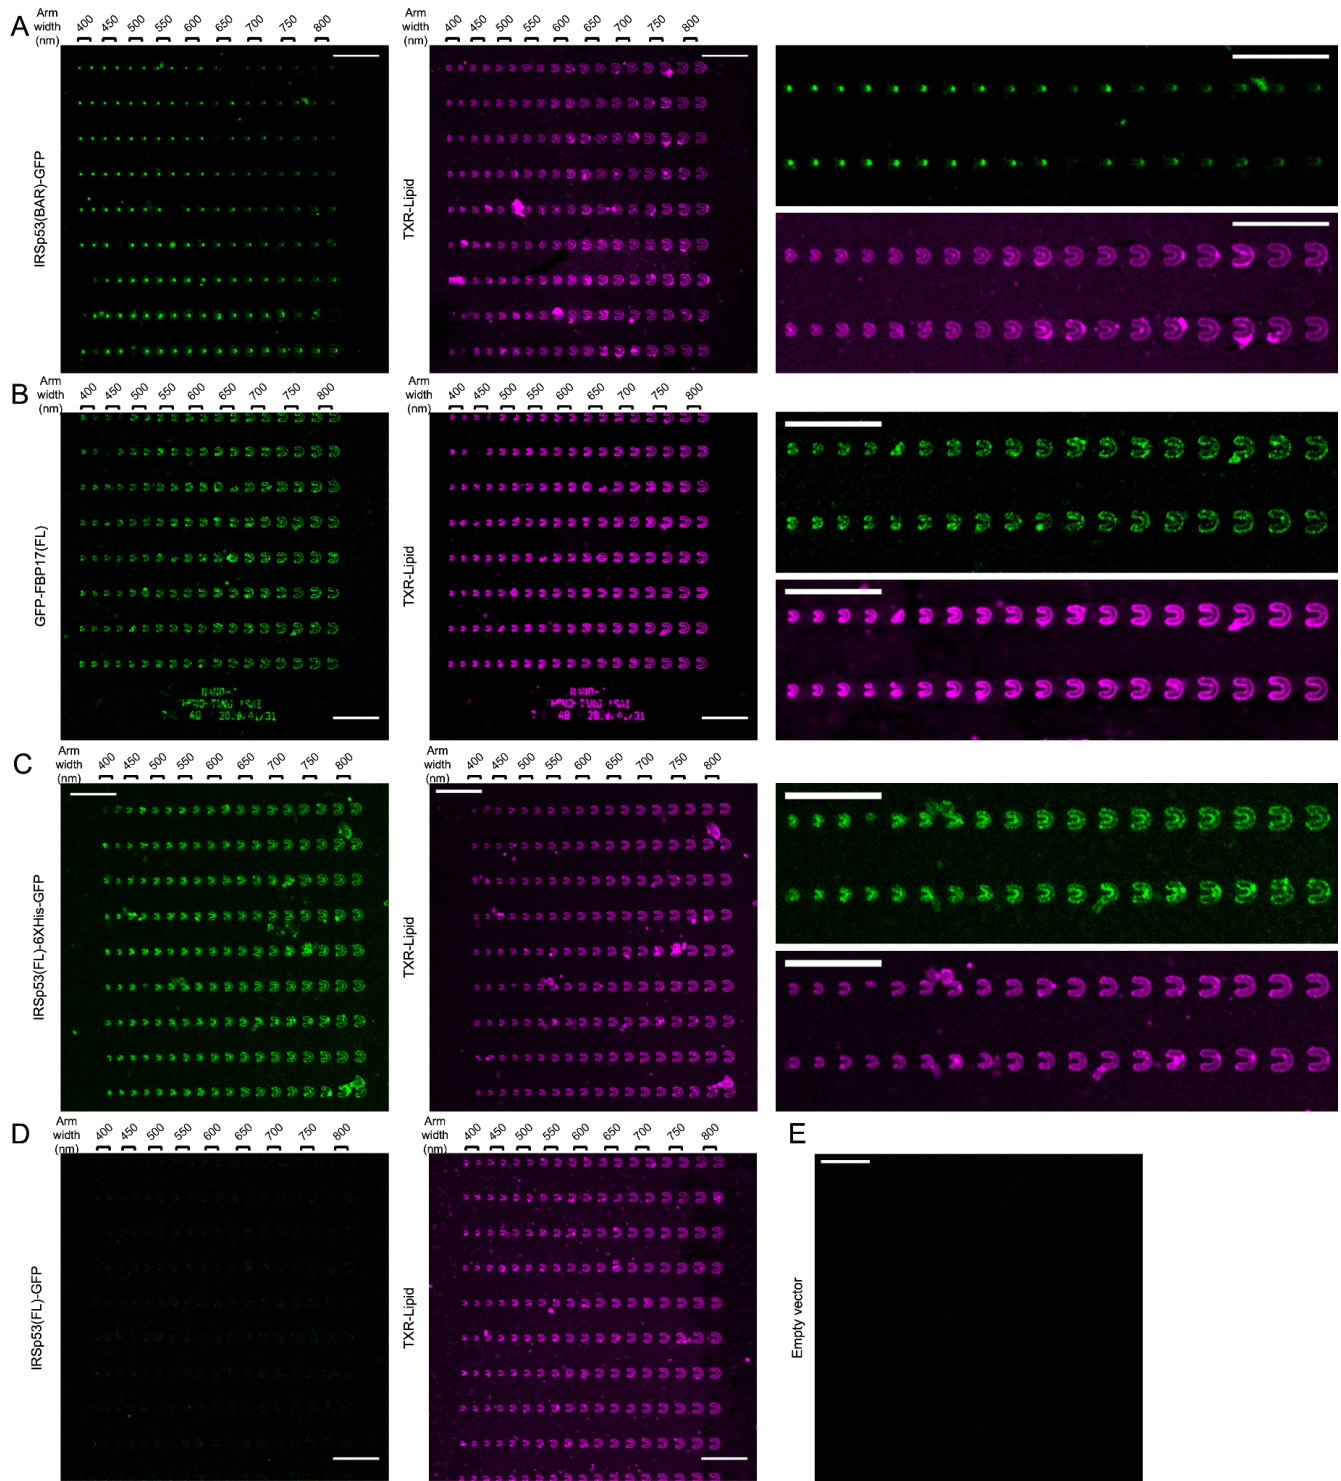

**Supplementary Figure 8. Representative whole-field and zoom-in fluorescence images of BAR protein lysates on SLB-coated nanoU arrays. (A) IRSp53(BAR)-GFP; (B) GFP-FBP17(FL); (C) IRSp53(FL)-6XHis-GFP; (D) IRSp53(FL)-GFP; (E) Empty vector. Scale bar: 20  $\mu$ m.**

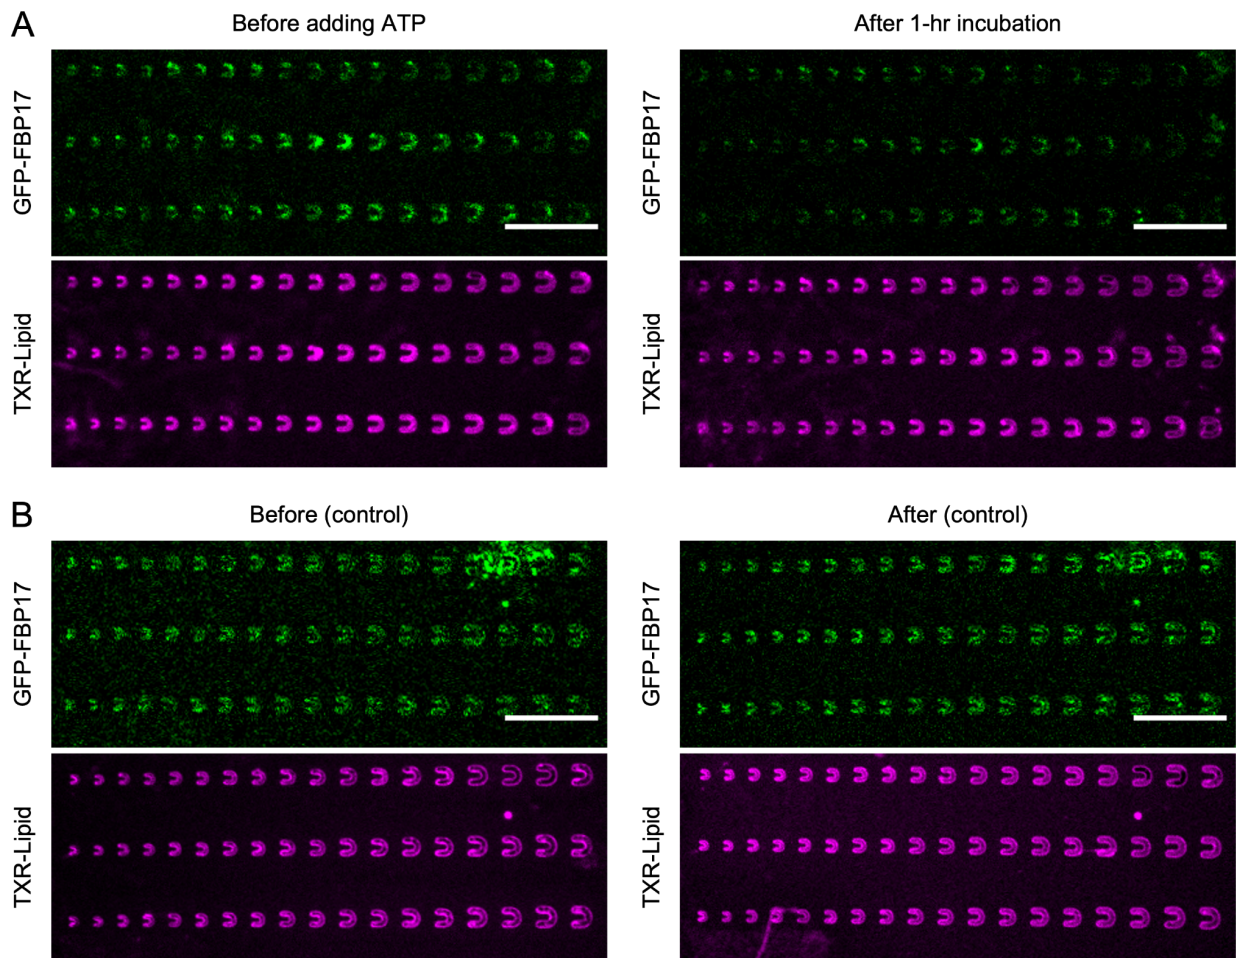

**Supplementary Figure 9. Representative fluorescence images from the c-Abl kinase experiments on SLB-coated nanoU arrays. (A)** c-Abl-catalyzed phosphorylation upon ATP addition significantly reduces the intensity of GFP-FBP17 on the lipid bilayer. **(B)** GFP-FBP17 fluorescence intensity does not change upon the addition of a control buffer. Scale bar: 20  $\mu\text{m}$ .

| Designed values |                             |                                           | Measured values (Diameter of curvature) |                     |                                   | Number of nanostructures measured |
|-----------------|-----------------------------|-------------------------------------------|-----------------------------------------|---------------------|-----------------------------------|-----------------------------------|
| Arm width (nm)  | Crossing angle ( $\theta$ ) | Complementary crossing angle ( $\theta$ ) | Arm end (nm)                            | Crossing angle (nm) | Complementary crossing angle (nm) |                                   |
| 400             | 15                          | 165                                       | 447±43.2                                | 354±15.8            | 5749±1449                         | 10                                |
|                 | 30                          | 150                                       | 397±26.3                                | 436±51.8            | 3797±840                          | 10                                |
|                 | 45                          | 135                                       | 438±36.2                                | 491±45.4            | 2680±293                          | 10                                |
|                 | 60                          | 120                                       | 480±46.1                                | 648±45.2            | 2050±270                          | 10                                |
|                 | 75                          | 105                                       | 491±39.7                                | 706±57.9            | 1416±125                          | 10                                |
|                 | 90                          | 90                                        | 487±33.1                                | 825±96.2            | 966±83.2                          | 10                                |

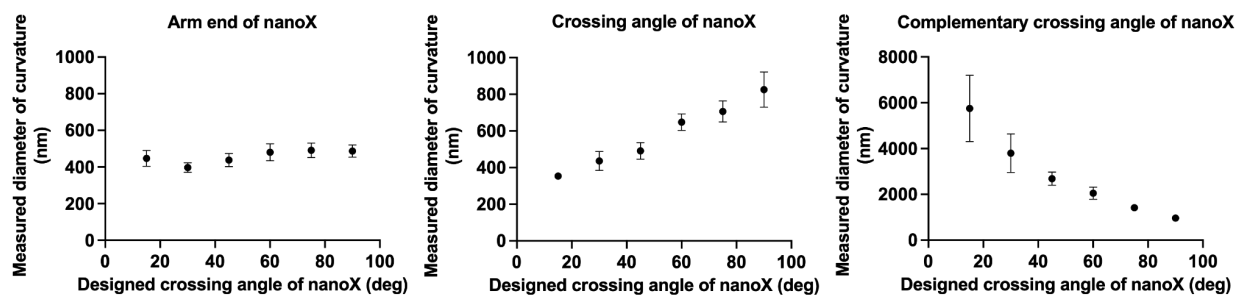

**Supplementary Table 1. Characterization of gradient nanoX arrays.**

Error bars represent standard deviation.



| Desired Arm width (nm) | Measured values (Diameter of curvature) |                   |                 | Number of nanostructures measured |
|------------------------|-----------------------------------------|-------------------|-----------------|-----------------------------------|
|                        | Arm end (nm)                            | Inner groove (nm) | Outer face (nm) |                                   |
| 400                    | 382±39.4                                | 388±39.9          | 1148±75.5       | 10                                |
| 450                    | 443±28.0                                | 516±62.2          | 1384±92.0       | 10                                |
| 500                    | 489±21.1                                | 593±32.8          | 1487±31.9       | 10                                |
| 550                    | 562±23.0                                | 623±59.2          | 1672±141        | 10                                |
| 600                    | 599±38.6                                | 663±54.2          | 1811±89.4       | 10                                |
| 650                    | 644±36.0                                | 708±39.1          | 1928±74.2       | 10                                |
| 700                    | 711±29.5                                | 783±49.3          | 2136±85.2       | 10                                |
| 750                    | 757±33.5                                | 823±61.2          | 2230±168        | 10                                |
| 800                    | 795±44.1                                | 859±67.1          | 2378±152        | 10                                |

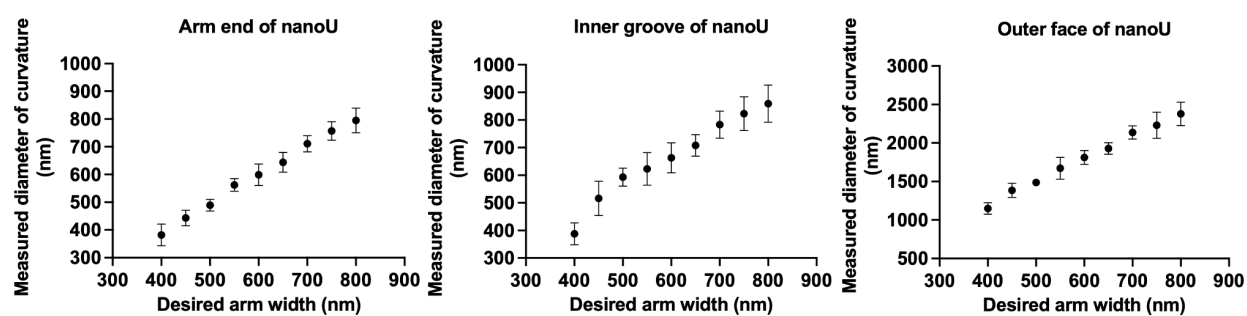

**Supplementary Table 2. Characterization of gradient nanoU arrays.**

Error bars represent standard deviation.

**A**

| Target           | Desired Crossing angle ( $\theta$ ) | Normalized intensity (A.U.) |      |      |                       | Number of fields of view considered (N) | Number of nanostructures measured (n) | Corresponding figure |
|------------------|-------------------------------------|-----------------------------|------|------|-----------------------|-----------------------------------------|---------------------------------------|----------------------|
|                  |                                     | NanoX region                | Mean | SD   | SEM (SD/ $\sqrt{N}$ ) |                                         |                                       |                      |
| IRSp53 (BAR)-GFP | 15                                  | End                         | 1.56 | 0.80 | 0.23                  | 12                                      | 168                                   | Fig. 1E              |
|                  |                                     | Inner face                  | 5.50 | 3.49 | 1.01                  |                                         |                                       |                      |
|                  |                                     | Complementary inner face    | 0.83 | 0.56 | 0.16                  |                                         |                                       |                      |
|                  | 30                                  | End                         | 0.88 | 0.15 | 0.04                  | 12                                      | 182                                   |                      |
|                  |                                     | Inner face                  | 4.29 | 2.71 | 0.78                  |                                         |                                       |                      |
|                  |                                     | Complementary inner face    | 0.71 | 0.30 | 0.09                  |                                         |                                       |                      |
|                  | 45                                  | End                         | 0.83 | 0.12 | 0.03                  | 12                                      | 196                                   |                      |
|                  |                                     | Inner face                  | 3.91 | 2.16 | 0.62                  |                                         |                                       |                      |
|                  |                                     | Complementary inner face    | 0.92 | 0.25 | 0.07                  |                                         |                                       |                      |
|                  | 60                                  | End                         | 0.86 | 0.10 | 0.03                  | 12                                      | 186                                   |                      |
|                  |                                     | Inner face                  | 3.36 | 1.62 | 0.47                  |                                         |                                       |                      |
|                  |                                     | Complementary inner face    | 1.31 | 0.19 | 0.05                  |                                         |                                       |                      |
| 75               | End                                 | 0.73                        | 0.13 | 0.04 | 11                    | 171                                     |                                       |                      |
|                  | Inner face                          | 2.53                        | 0.95 | 0.29 |                       |                                         |                                       |                      |
|                  | Complementary inner face            | 1.55                        | 0.19 | 0.06 |                       |                                         |                                       |                      |
| 90               | End                                 | 0.73                        | 0.14 | 0.04 | 11                    | 167                                     |                                       |                      |
|                  | Inner face                          | 1.98                        | 0.55 | 0.17 |                       |                                         |                                       |                      |
|                  | Complementary inner face            | 1.96                        | 0.54 | 0.16 |                       |                                         |                                       |                      |

**B**

| Target         | Desired Crossing angle ( $\theta$ ) | Normalized intensity (A.U.) |      |      |                       | Number of fields of view considered (N) | Number of nanostructures measured (n) | Corresponding figure |
|----------------|-------------------------------------|-----------------------------|------|------|-----------------------|-----------------------------------------|---------------------------------------|----------------------|
|                |                                     | NanoX region                | Mean | SD   | SEM (SD/ $\sqrt{N}$ ) |                                         |                                       |                      |
| GFP-FBP17 (FL) | 15                                  | End                         | 2.22 | 0.32 | 0.16                  | 4                                       | 72                                    | Fig. 1H              |
|                |                                     | Inner face                  | 1.18 | 0.15 | 0.07                  |                                         |                                       |                      |
|                |                                     | Complementary inner face    | 1.08 | 0.04 | 0.02                  |                                         |                                       |                      |
|                | 30                                  | End                         | 2.20 | 0.56 | 0.25                  | 5                                       | 90                                    |                      |
|                |                                     | Inner face                  | 0.99 | 0.24 | 0.11                  |                                         |                                       |                      |
|                |                                     | Complementary inner face    | 0.97 | 0.12 | 0.05                  |                                         |                                       |                      |
|                | 45                                  | End                         | 2.21 | 0.47 | 0.21                  | 5                                       | 90                                    |                      |
|                |                                     | Inner face                  | 0.94 | 0.09 | 0.04                  |                                         |                                       |                      |
|                |                                     | Complementary inner face    | 0.85 | 0.13 | 0.06                  |                                         |                                       |                      |
|                | 60                                  | End                         | 2.64 | 0.38 | 0.17                  | 5                                       | 90                                    |                      |
|                |                                     | Inner face                  | 0.93 | 0.10 | 0.04                  |                                         |                                       |                      |
|                |                                     | Complementary inner face    | 0.92 | 0.09 | 0.04                  |                                         |                                       |                      |
| 75             | End                                 | 2.44                        | 0.22 | 0.10 | 5                     | 90                                      |                                       |                      |
|                | Inner face                          | 0.90                        | 0.17 | 0.07 |                       |                                         |                                       |                      |
|                | Complementary inner face            | 1.16                        | 0.18 | 0.08 |                       |                                         |                                       |                      |
| 90             | End                                 | 2.36                        | 0.46 | 0.21 | 5                     | 90                                      |                                       |                      |
|                | Inner face                          | 0.99                        | 0.13 | 0.06 |                       |                                         |                                       |                      |
|                | Complementary inner face            | 0.98                        | 0.14 | 0.06 |                       |                                         |                                       |                      |

**Supplementary Table 3. Statistical analysis for Figure 1.**

**A**

| Target           | Desired Arm width (nm) | Normalized intensity (A.U.) |      |      | Number of fields of view considered (N) | Number of nanostructures measured (n) | Corresponding figure |
|------------------|------------------------|-----------------------------|------|------|-----------------------------------------|---------------------------------------|----------------------|
|                  |                        | NanoU region                | Mean | SD   |                                         |                                       |                      |
| IRSp53 (BAR)-GFP | 400                    | End                         | 3.03 | 1.12 | 0.35                                    | 10                                    | 165                  |
|                  |                        | Inner groove                | 16.3 | 9.18 | 2.90                                    |                                       |                      |
|                  | 450                    | End                         | 2.27 | 0.98 | 0.28                                    | 12                                    | 198                  |
|                  |                        | Inner groove                | 14.6 | 12.2 | 3.53                                    |                                       |                      |
|                  | 500                    | End                         | 2.11 | 0.90 | 0.26                                    | 12                                    | 196                  |
|                  |                        | Inner groove                | 13.5 | 10.6 | 3.07                                    |                                       |                      |
|                  | 550                    | End                         | 1.67 | 0.47 | 0.14                                    | 12                                    | 187                  |
|                  |                        | Inner groove                | 12.4 | 7.98 | 2.30                                    |                                       |                      |
|                  | 600                    | End                         | 2.10 | 0.93 | 0.27                                    | 12                                    | 196                  |
|                  |                        | Inner groove                | 13.5 | 8.43 | 2.43                                    |                                       |                      |
|                  | 650                    | End                         | 1.78 | 0.67 | 0.19                                    | 12                                    | 188                  |
|                  |                        | Inner groove                | 11.1 | 6.39 | 1.85                                    |                                       |                      |
|                  | 700                    | End                         | 1.60 | 0.65 | 0.20                                    | 11                                    | 172                  |
|                  |                        | Inner groove                | 10.0 | 7.07 | 2.13                                    |                                       |                      |
|                  | 750                    | End                         | 2.00 | 1.34 | 0.39                                    | 12                                    | 173                  |
|                  |                        | Inner groove                | 9.37 | 4.96 | 1.43                                    |                                       |                      |
| 800              | End                    | 1.51                        | 0.66 | 0.19 | 12                                      | 180                                   |                      |
|                  | Inner groove           | 7.53                        | 4.90 | 1.42 |                                         |                                       |                      |

**B**

| Target         | Desired Arm width (nm) | Normalized intensity (A.U.) |      |      | Number of fields of view considered (N) | Number of nanostructures measured (n) | Corresponding figure |
|----------------|------------------------|-----------------------------|------|------|-----------------------------------------|---------------------------------------|----------------------|
|                |                        | NanoU region                | Mean | SD   |                                         |                                       |                      |
| GFP-FBP17 (FL) | 400                    | End                         | 2.01 | 1.14 | 0.33                                    | 12                                    | 152                  |
|                |                        | Inner groove                | 1.05 | 0.56 | 0.16                                    |                                       |                      |
|                | 450                    | End                         | 1.70 | 0.59 | 0.17                                    | 12                                    | 155                  |
|                |                        | Inner groove                | 1.10 | 0.69 | 0.20                                    |                                       |                      |
|                | 500                    | End                         | 1.49 | 0.30 | 0.09                                    | 10                                    | 162                  |
|                |                        | Inner groove                | 0.92 | 0.17 | 0.05                                    |                                       |                      |
|                | 550                    | End                         | 1.36 | 0.32 | 0.09                                    | 12                                    | 177                  |
|                |                        | Inner groove                | 0.93 | 0.26 | 0.08                                    |                                       |                      |
|                | 600                    | End                         | 1.35 | 0.24 | 0.07                                    | 12                                    | 183                  |
|                |                        | Inner groove                | 0.98 | 0.22 | 0.06                                    |                                       |                      |
|                | 650                    | End                         | 1.37 | 0.23 | 0.07                                    | 11                                    | 182                  |
|                |                        | Inner groove                | 0.93 | 0.21 | 0.06                                    |                                       |                      |
|                | 700                    | End                         | 1.25 | 0.15 | 0.05                                    | 10                                    | 158                  |
|                |                        | Inner groove                | 0.89 | 0.18 | 0.06                                    |                                       |                      |
|                | 750                    | End                         | 1.31 | 0.22 | 0.06                                    | 12                                    | 193                  |
|                |                        | Inner groove                | 0.98 | 0.20 | 0.06                                    |                                       |                      |
| 800            | End                    | 1.13                        | 0.18 | 0.05 | 12                                      | 188                                   |                      |
|                | Inner groove           | 0.90                        | 0.28 | 0.08 |                                         |                                       |                      |

**Supplementary Table 4. Statistical analysis for Figure 2.**

**A**

| Target               | Normalized intensity (A.U.) |      | Number of fields of view considered (N) | Corresponding figure |
|----------------------|-----------------------------|------|-----------------------------------------|----------------------|
|                      | Mean                        | SD   |                                         |                      |
| Empty vector         | 2.47                        | 0.29 | 4                                       | Fig. 3C              |
| IRSp53(FL)-GFP       | 2.26                        | 0.08 | 4                                       |                      |
| IRSp53(FL)-6XHis-GFP | 10.3                        | 2.03 | 13                                      |                      |
| IRSp53(BAR)-GFP      | 14.1                        | 4.57 | 15                                      |                      |

**B**

| Target                | Desired Arm width (nm) | Normalized intensity (A.U.) |      |      |                       | Number of fields of view considered (N) | Number of nanostructures measured (n) | Corresponding figure |
|-----------------------|------------------------|-----------------------------|------|------|-----------------------|-----------------------------------------|---------------------------------------|----------------------|
|                       |                        | NanoU region                | Mean | SD   | SEM (SD/ $\sqrt{N}$ ) |                                         |                                       |                      |
| IRSp53 (FL)-6XHis-GFP | 400                    | End                         | 0.99 | 0.31 | 0.08                  | 13                                      | 159                                   | Fig. 3E              |
|                       |                        | Inner groove                | 2.43 | 0.86 | 0.24                  |                                         |                                       |                      |
|                       | 450                    | End                         | 1.06 | 0.25 | 0.07                  | 13                                      | 175                                   |                      |
|                       |                        | Inner groove                | 2.33 | 1.05 | 0.29                  |                                         |                                       |                      |
|                       | 500                    | End                         | 0.94 | 0.14 | 0.04                  | 13                                      | 196                                   |                      |
|                       |                        | Inner groove                | 1.96 | 0.96 | 0.27                  |                                         |                                       |                      |
|                       | 550                    | End                         | 0.93 | 0.18 | 0.05                  | 13                                      | 207                                   |                      |
|                       |                        | Inner groove                | 1.78 | 0.71 | 0.20                  |                                         |                                       |                      |
|                       | 600                    | End                         | 0.91 | 0.19 | 0.05                  | 13                                      | 203                                   |                      |
|                       |                        | Inner groove                | 1.82 | 0.65 | 0.18                  |                                         |                                       |                      |
|                       | 650                    | End                         | 0.97 | 0.16 | 0.04                  | 13                                      | 209                                   |                      |
|                       |                        | Inner groove                | 1.71 | 0.68 | 0.19                  |                                         |                                       |                      |
|                       | 700                    | End                         | 0.96 | 0.18 | 0.05                  | 13                                      | 213                                   |                      |
|                       |                        | Inner groove                | 1.76 | 0.75 | 0.21                  |                                         |                                       |                      |
|                       | 750                    | End                         | 0.98 | 0.18 | 0.05                  | 13                                      | 200                                   |                      |
|                       |                        | Inner groove                | 1.50 | 0.44 | 0.12                  |                                         |                                       |                      |
| 800                   | End                    | 0.98                        | 0.17 | 0.05 | 13                    | 214                                     |                                       |                      |
|                       | Inner groove           | 1.58                        | 0.57 | 0.16 |                       |                                         |                                       |                      |

**Supplementary Table 5. Statistical analysis for Figure 3.**

**A**

| Target                              | Desired Arm width (nm) | Normalized intensity (A.U.) |      |      | Number of fields of view considered (N) | Number of nanostructures measured (n) | Corresponding figure |                       |
|-------------------------------------|------------------------|-----------------------------|------|------|-----------------------------------------|---------------------------------------|----------------------|-----------------------|
|                                     |                        | NanoU region                | Mean | SD   |                                         |                                       |                      | SEM ( $SD/\sqrt{N}$ ) |
| GFP-FBP17 (FL)<br>Before adding ATP | 400                    | End                         | 1.38 | 0.21 | 0.07                                    | 9                                     | 162                  | Fig. 4E               |
|                                     | 450                    |                             | 1.30 | 0.22 | 0.07                                    | 9                                     |                      |                       |
|                                     | 500                    |                             | 1.21 | 0.18 | 0.06                                    | 9                                     |                      |                       |
|                                     | 550                    |                             | 1.16 | 0.16 | 0.05                                    | 9                                     |                      |                       |
|                                     | 600                    |                             | 1.23 | 0.13 | 0.04                                    | 9                                     |                      |                       |
|                                     | 650                    |                             | 1.17 | 0.20 | 0.07                                    | 9                                     |                      |                       |
|                                     | 700                    |                             | 1.12 | 0.13 | 0.04                                    | 9                                     |                      |                       |
|                                     | 750                    |                             | 1.13 | 0.14 | 0.05                                    | 9                                     |                      |                       |
| 800                                 | 1.11                   | 0.21                        | 0.07 | 9    | 162                                     |                                       |                      |                       |

  

**B**

| Target                                  | Desired Arm width (nm) | Normalized intensity (A.U.) |      |      | Number of fields of view considered (N) | Number of nanostructures measured (n) | Corresponding figure |                       |
|-----------------------------------------|------------------------|-----------------------------|------|------|-----------------------------------------|---------------------------------------|----------------------|-----------------------|
|                                         |                        | NanoU region                | Mean | SD   |                                         |                                       |                      | SEM ( $SD/\sqrt{N}$ ) |
| GFP-FBP17 (FL)<br>1-hr After adding ATP | 400                    | End                         | 1.34 | 0.24 | 0.09                                    | 7                                     | 124                  | Fig. 4F               |
|                                         | 450                    |                             | 1.27 | 0.23 | 0.09                                    | 7                                     |                      |                       |
|                                         | 500                    |                             | 1.23 | 0.27 | 0.10                                    | 7                                     |                      |                       |
|                                         | 550                    |                             | 1.16 | 0.18 | 0.07                                    | 7                                     |                      |                       |
|                                         | 600                    |                             | 1.01 | 0.18 | 0.07                                    | 7                                     |                      |                       |
|                                         | 650                    |                             | 1.09 | 0.18 | 0.07                                    | 7                                     |                      |                       |
|                                         | 700                    |                             | 1.06 | 0.16 | 0.06                                    | 7                                     |                      |                       |
|                                         | 750                    |                             | 1.02 | 0.17 | 0.06                                    | 7                                     |                      |                       |
| 800                                     | 1.04                   | 0.19                        | 0.07 | 7    | 124                                     |                                       |                      |                       |

**Supplementary Table 6. Statistical analysis for Figure 4.**
